# Supplementary material for: Bioinformatic Analysis of Expression Data from Patients with Multiple Sclerosis
Source: Research Square preprint supplement (doi:10.21203/rs.3.rs-6512879/v1), 2025-05-05
Supplement: Supplementary file 1 [file 59fcdbc1cb2d0d461bf8691d.docx]

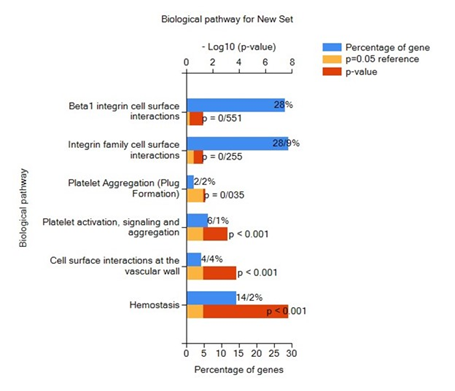

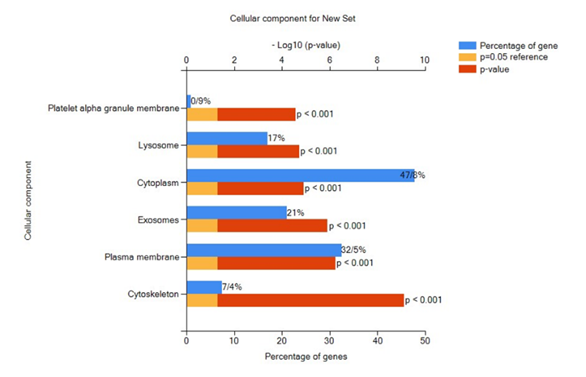


**(b)**

**(a)**


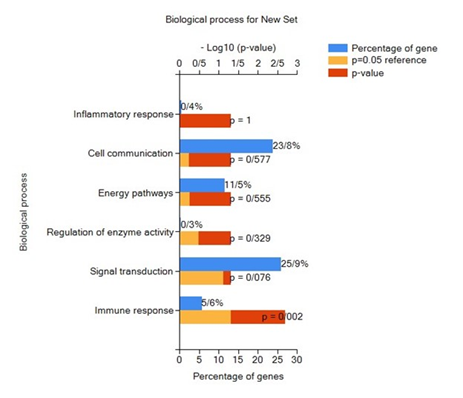

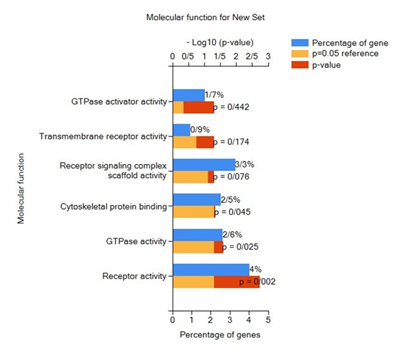


**(d)**

**(c)**

Figure S1. Diagrams obtained from the FunRich program illustrating various aspects of gene enrichment analysis: (a) Biological pathway diagram. (b) Cellular component diagram. (c) Biological process diagram. (d) Molecular function diagram.

Table S1. List of the top 10 hub genes identified from the Protein-Protein Interaction (PPI) network using Cytoscape software via the Maximum Clique Centrality (MCC) pathway analysis.

| Pdb code | UNIPRUT CODE | Full name | GENE symbol |
| --- | --- | --- | --- |
| 3ZCW | P52732 | Kinesin Family Member 11 | KIF11 |
| 1FIN | P20248 | Cyclin A2 | CCNA2 |
| 4YC6 | P06493 | Cyclin Dependent Kinase 1 | CDK1 |
| 4QPM | O43683 | MitoticCheckpoint Serine/Threonine Kinase | BUB1 |
| 2RAW | Q53HL2 | Cell Division Cycle Associated 8 | CDCA8 |
| 7ZX4 | Q15398 | DLG Associated Protein 5 | DLGAP5 |
| 6YIP | O95235 | Kinesin Family Member 20A | KIF20A |
| 1OL5 | Q9ULW0 | TPX2 Microtubule Nucleation Factor | TPX2 |


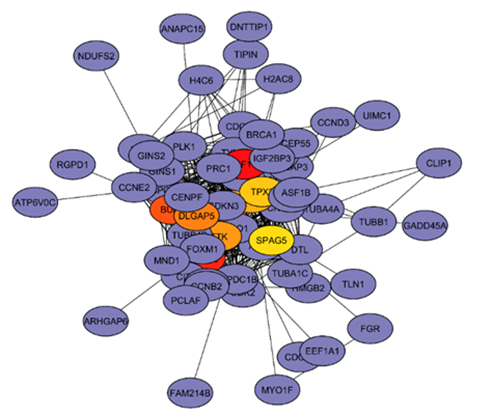


Figure S2. Gene interaction network based on Maximum Clique Centrality (MCC) analysis through the Cytohubba plugin in Cytoscape. This network illustrates the interactions among the top hub genes identified in the study.

Table S2. Comparison of the expression levels of hub genes between the drug-treated group and the MS group. The table highlights the differences in expression for each hub gene, showcasing their potential roles in the context of multiple sclerosis treatment.

| MS.Treat- MS.UnTreat | | | MS.UnTreat-Control | | | |
| --- | --- | --- | --- | --- | --- | --- |
| adj.P.Val | P.Value | logFC | adj.P.Val | P.Value | logFC | Gene Symbol |
| 0/294195 | 0/020366 | -0/31613 | 0/39678 | 0/002991 | 0/425092 | KIF11 |
| 0/195604 | 0/005532 | -0/33578 | 0/536509 | 0/01111 | 0/317227 | CCNA2 |
| 0/360281 | 0/03732 | 0/138399 | 0/644179 | 0/02534 | 0/281647 | CDK1 |
| 0/23779 | 0/010545 | -0/28409 | 0/312688 | 0/000879 | 0/38992 | BUB1 |
| 0/293963 | 0/02027 | -0/21322 | 0/467592 | 0/005229 | 0/268461 | CDCA8 |
| 0/238131 | 0/010952 | -0/35405 | 0/461864 | 0/005105 | 0/406252 | DLGAP5 |
| 0/397266 | 0/049055 | -0/20131 | 0/584877 | 0/015704 | 0/258167 | TTK |
| 0/092305 | 0/000619 | -0/34313 | 0/258899 | 0/000193 | 0/390777 | KIF20A |
| 0/303161 | 0/022291 | -0/25045 | 0/316761 | 0/00098 | 0/382744 | TPX2 |
| 0/343688 | 0/032656 | -0/21534 | 0/530014 | 0/010505 | 0/269498 | SPAG5 |

Table S3. List of drugs assessed for pharmacokinetic properties using Lipinski's rule of five, obtained from the SwissADME database. This table includes the compounds that meet the criteria for drug-likeness, highlighting their potential suitability for therapeutic applications.

| Drug  Names | Protein Names |
| --- | --- |
| 5-(3-AMINOPROPYL)-3-(2,5-DIFLUOROPHENYL)-N-ETHYL-5-PHENYL-4,5-DIHYDRO-1H-PYRAZOLE-1-CARBOXAMIDE | P52732 |
| Monastrol |
| (4R)-4-(3-HYDROXYPHENYL)-N,N,7,8-TETRAMETHYL-3,4-DIHYDROISOQUINOLINE-2(1H)-CARBOXAMIDE |
| N,N-DIETHYL-2-[(2-THIENYLCARBONYL)AMINO]-4,5,6,7-TETRAHYDRO-1-BENZOTHIOPHENE-3-CARBOXAMIDE |
| (5R)-N,N-DIETHYL-5-METHYL-2-[(THIOPHEN-2-YLCARBONYL)AMINO]-4,5,6,7-TETRAHYDRO-1-BENZOTHIOPHENE-3-CARBOXAMIDE |
| (2S)-4-(2,5-difluorophenyl)-N-[(3R,4S)-3-fluoro-1-methylpiperidin-4-yl]-2-(hydroxymethyl)-N-methyl-2-phenyl-2,5-dihydro-1H-pyrrole-1-carboxamide |
| [(4R)-4-(3-HYDROXYPHENYL)-1,6-DIMETHYL-2-THIOXO-1,2,3,4-TETRAHYDROPYRIMIDIN-5-YL](PHENYL)METHANONE |
| (2S)-4-(2,5-DIFLUOROPHENYL)-N-METHYL-2-PHENYL-N-PIPERIDIN-4-YL-2,5-DIHYDRO-1H-PYRROLE-1-CARBOXAMIDE |
| (1S)-1-CYCLOPROPYL-2-[(2S)-4-(2,5-DIFLUOROPHENYL)-2-PHENYL-2,5-DIHYDRO-1H-PYRROL-1-YL]-2-OXOETHANAMINE |
| (2S)-4-(2,5-DIFLUOROPHENYL)-N,N-DIMETHYL-2-PHENYL-2,5-DIHYDRO-1H-PYRROLE-1-CARBOXAMIDE |
| (5S)-5-(3-AMINOPROPYL)-3-(2,5-DIFLUOROPHENYL)-N-ETHYL-5-PHENYL-4,5-DIHYDRO-1H-PYRAZOLE-1-CARBOXAMIDE |
| 4-(2,4-Dimethyl-Thiazol-5-Yl)-Pyrimidin-2-Ylamine | P20248 |
| 6-O-Cyclohexylmethyl Guanine |
| [4-(2-Amino-4-Methyl-Thiazol-5-Yl)-Pyrimidin-2-Yl]-(3-Nitro-Phenyl)-Amine |
| 4-(2,4-Dimethyl-Thiazol-5-Yl)-Pyrimidin-2-Yl]-(4-Trifluoromethyl-Phenyl)-Amine |
| 4-[(7-OXO-7H-THIAZOLO[5,4-E]INDOL-8-YLMETHYL)-AMINO]-N-PYRIDIN-2-YL-BENZENESULFONAMIDE |
| N-(3-cyclopropyl-1H-pyrazol-5-yl)-2-(2-naphthyl)acetamide |
| O6-CYCLOHEXYLMETHOXY-2-(4'-SULPHAMOYLANILINO) PURINE |
| N-cyclopropyl-4-pyrazolo[1,5-b]pyridazin-3-ylpyrimidin-2-amine |
| 6-CYCLOHEXYLMETHOXY-2-(3'-CHLOROANILINO) PURINE |
| 5-[5,6-BIS(METHYLOXY)-1H-BENZIMIDAZOL-1-YL]-3-{[1-(2-CHLOROPHENYL)ETHYL]OXY}-2-THIOPHENECARBOXAMIDE |
| 4-{5-[(Z)-(2-IMINO-4-OXO-1,3-THIAZOLIDIN-5-YLIDENE)METHYL]-2-FURYL}-N-METHYLBENZENESULFONAMIDE |
| 4-{5-[(Z)-(2-IMINO-4-OXO-1,3-THIAZOLIDIN-5-YLIDENE)METHYL]FURAN-2-YL}BENZENESULFONAMIDE |
| 4-{5-[(Z)-(2-IMINO-4-OXO-1,3-THIAZOLIDIN-5-YLIDENE)METHYL]FURAN-2-YL}-2-(TRIFLUOROMETHYL)BENZENESULFONAMIDE |
| 4-{5-[(Z)-(2-IMINO-4-OXO-1,3-THIAZOLIDIN-5-YLIDENE)METHYL]FURAN-2-YL}BENZOIC ACID |
| N-[4-(2,4-DIMETHYL-THIAZOL-5-YL)-PYRIMIDIN-2-YL]-N',N'-DIMETHYL-BENZENE-1,4-DIAMINE |
| 4-{[5-(CYCLOHEXYLOXY)[1,2,4]TRIAZOLO[1,5-A]PYRIMIDIN-7-YL]AMINO}BENZENESULFONAMIDE |
| 1-(3,5-DICHLOROPHENYL)-5-METHYL-1H-1,2,4-TRIAZOLE-3-CARBOXYLIC ACID |
| 4-(4-methoxy-1H-pyrrolo[2,3-b]pyridin-3-yl)pyrimidin-2-amine |
| 4-(4-propoxy-1H-pyrrolo[2,3-b]pyridin-3-yl)pyrimidin-2-amine |
| HYDROXY(OXO)(3-{[(2Z)-4-[3-(1H-1,2,4-TRIAZOL-1-YLMETHYL)PHENYL]PYRIMIDIN-2(5H)-YLIDENE]AMINO}PHENYL)AMMONIUM |
| 4-Methyl-5-[(2Z)-2-{[4-(4-morpholinyl)phenyl]imino}-2,5-dihydro-4-pyrimidinyl]-1,3-thiazol-2-amine |
| 6-CYCLOHEXYLMETHYLOXY-2-(4'-HYDROXYANILINO)PURINE |
| 4-(6-CYCLOHEXYLMETHOXY-9H-PURIN-2-YLAMINO)--BENZAMIDE |
| 3-(6-CYCLOHEXYLMETHOXY-9H-PURIN-2-YLAMINO)-BENZENESULFONAMIDE |
| (2R)-2-{[4-(benzylamino)-8-(1-methylethyl)pyrazolo[1,5-a][1,3,5]triazin-2-yl]amino}butan-1-ol |
| 3-({2-[(4-{[6-(CYCLOHEXYLMETHOXY)-9H-PURIN-2-YL]AMINO}PHENYL)SULFONYL]ETHYL}AMINO)PROPAN-1-OL |
| 1-methyl-8-(phenylamino)-4,5-dihydro-1H-pyrazolo[4,3-h]quinazoline-3-carboxylic acid |
| (2R)-2-({9-(1-methylethyl)-6-[(4-pyridin-2-ylbenzyl)amino]-9H-purin-2-yl}amino)butan-1-ol |
| 1-[4-(AMINOSULFONYL)PHENYL]-1,6-DIHYDROPYRAZOLO[3,4-E]INDAZOLE-3-CARBOXAMIDE |
| 4-{[4-AMINO-6-(CYCLOHEXYLMETHOXY)-5-NITROSOPYRIMIDIN-2-YL]AMINO}BENZAMIDE |
| 9-amino-5-(2-aminopyrimidin-4-yl)pyrido[3',2':4,5]pyrrolo[1,2-c]pyrimidin-4-ol |
| Indirubin-3'-Monoxime | P06493 |
| Olomoucine |
| Hymenialdisine |
| SU9516 |
| Flavopiridol |
| Alsterpaullone |
| AT7519 |

Table S4. Docking results of the top 5 compounds against KIF11. The table includes binding energies and key interacting amino acids, illustrating the interaction profiles of each compound with the KIF11 protein.

| Ligad Name | Binding Affinity (kj/mol) | H-bond and length(Å) | Hydrophobic interaction |
| --- | --- | --- | --- |
| 99443535 | -9.50 | Tyr104(3.04), Arg355(3.00) | Ala356, Thr300, Ile299, Gly296, Ile332, Ser269, Leu292, Leu293, Tyr352 |
| 6102824 | -9.30 | Thr300(2.90), Gly296(3.02) | Ala356, Arg355, Ile299, Ile332, Tyr104, Tyr352, Ala355, Leu293 |
| 5288685 | -9.00 | Thr300(2.90), Leu292(2.09) | Arg355, Leu299, Gly296, Tyr352, Leu293, Leu295, Tyr104, Ala356 |
| 11840968 | -8.80 | - | Ile288, Leu293, Arg297, Tyr352, Gly296, Tyr104, Ile299, Leu292, Asn289 |
| 1190625 | -8.50 | Thr300(2.90), Gly296(3.02) | Ala356, Arg355, Ile299, Glu304, Ile332, Val303, Tyr104, Tyr352 |
| Filanesib | 8.00 | - | Leu293, Leu292, Leu266, Tyr352, Tyr104, Ala356, Ala355, Arg355, Ile332, Thr300, Ile299, Gly296, Thr49 |


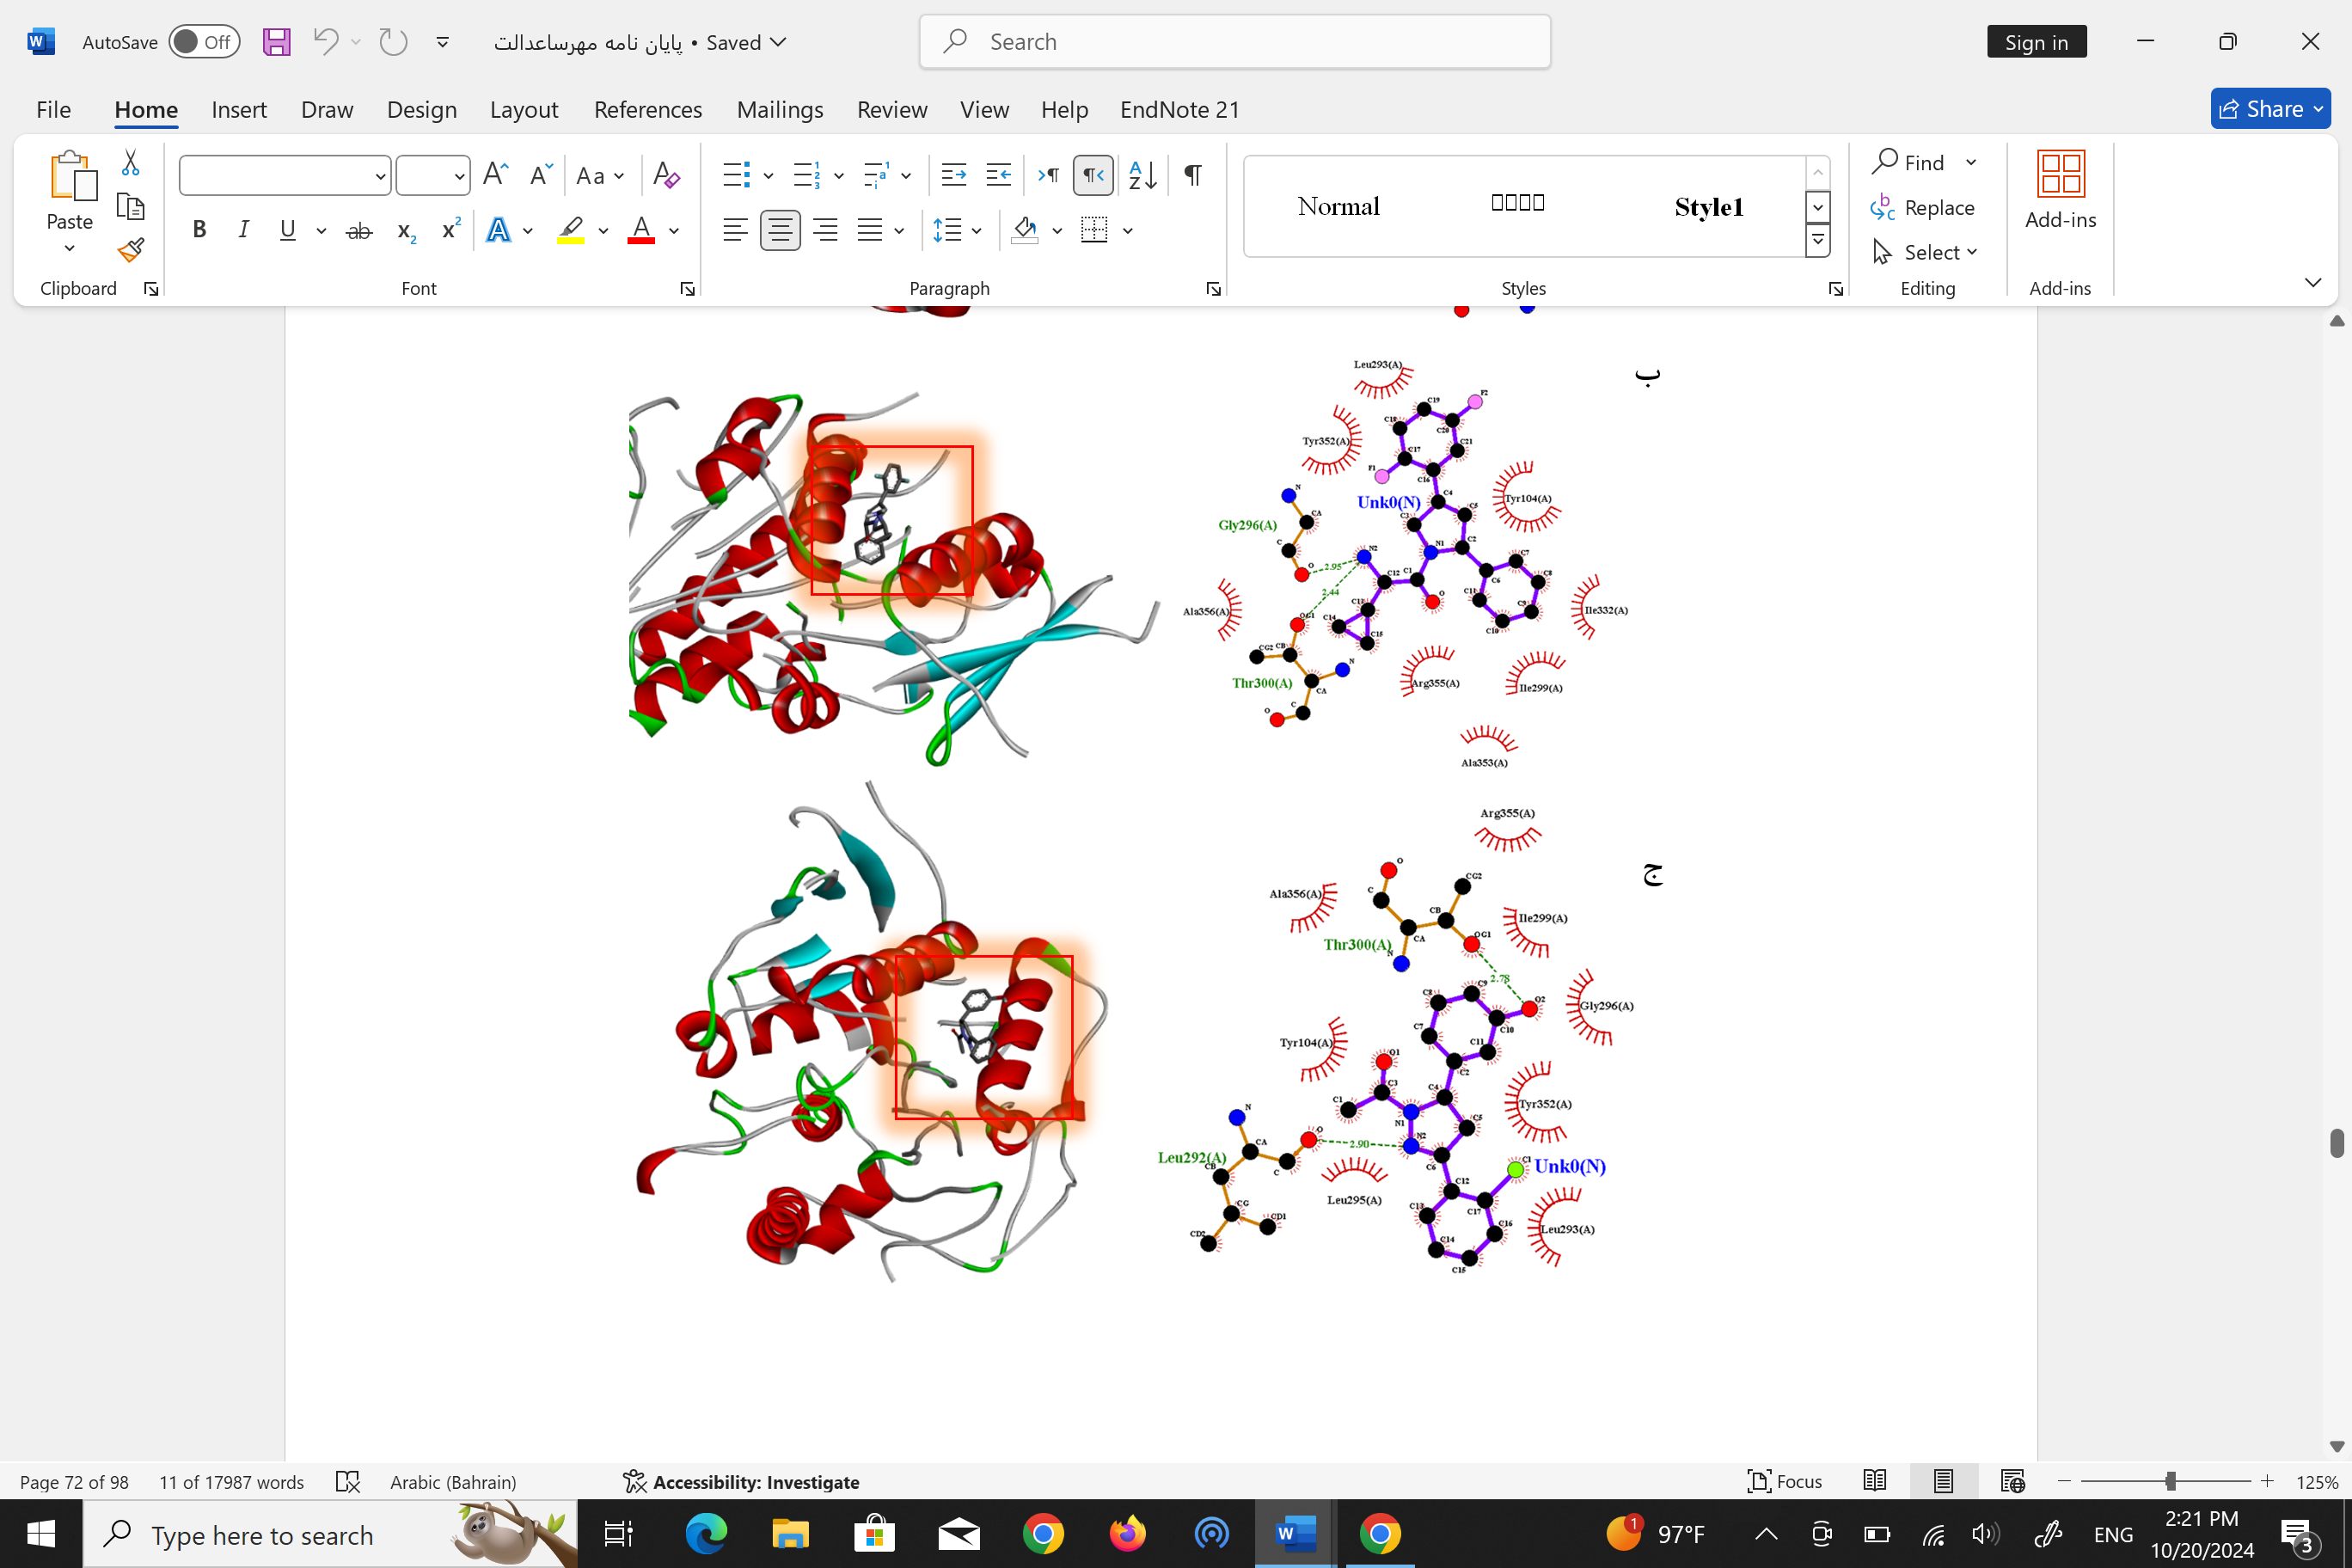


**(a)**

**(b)**


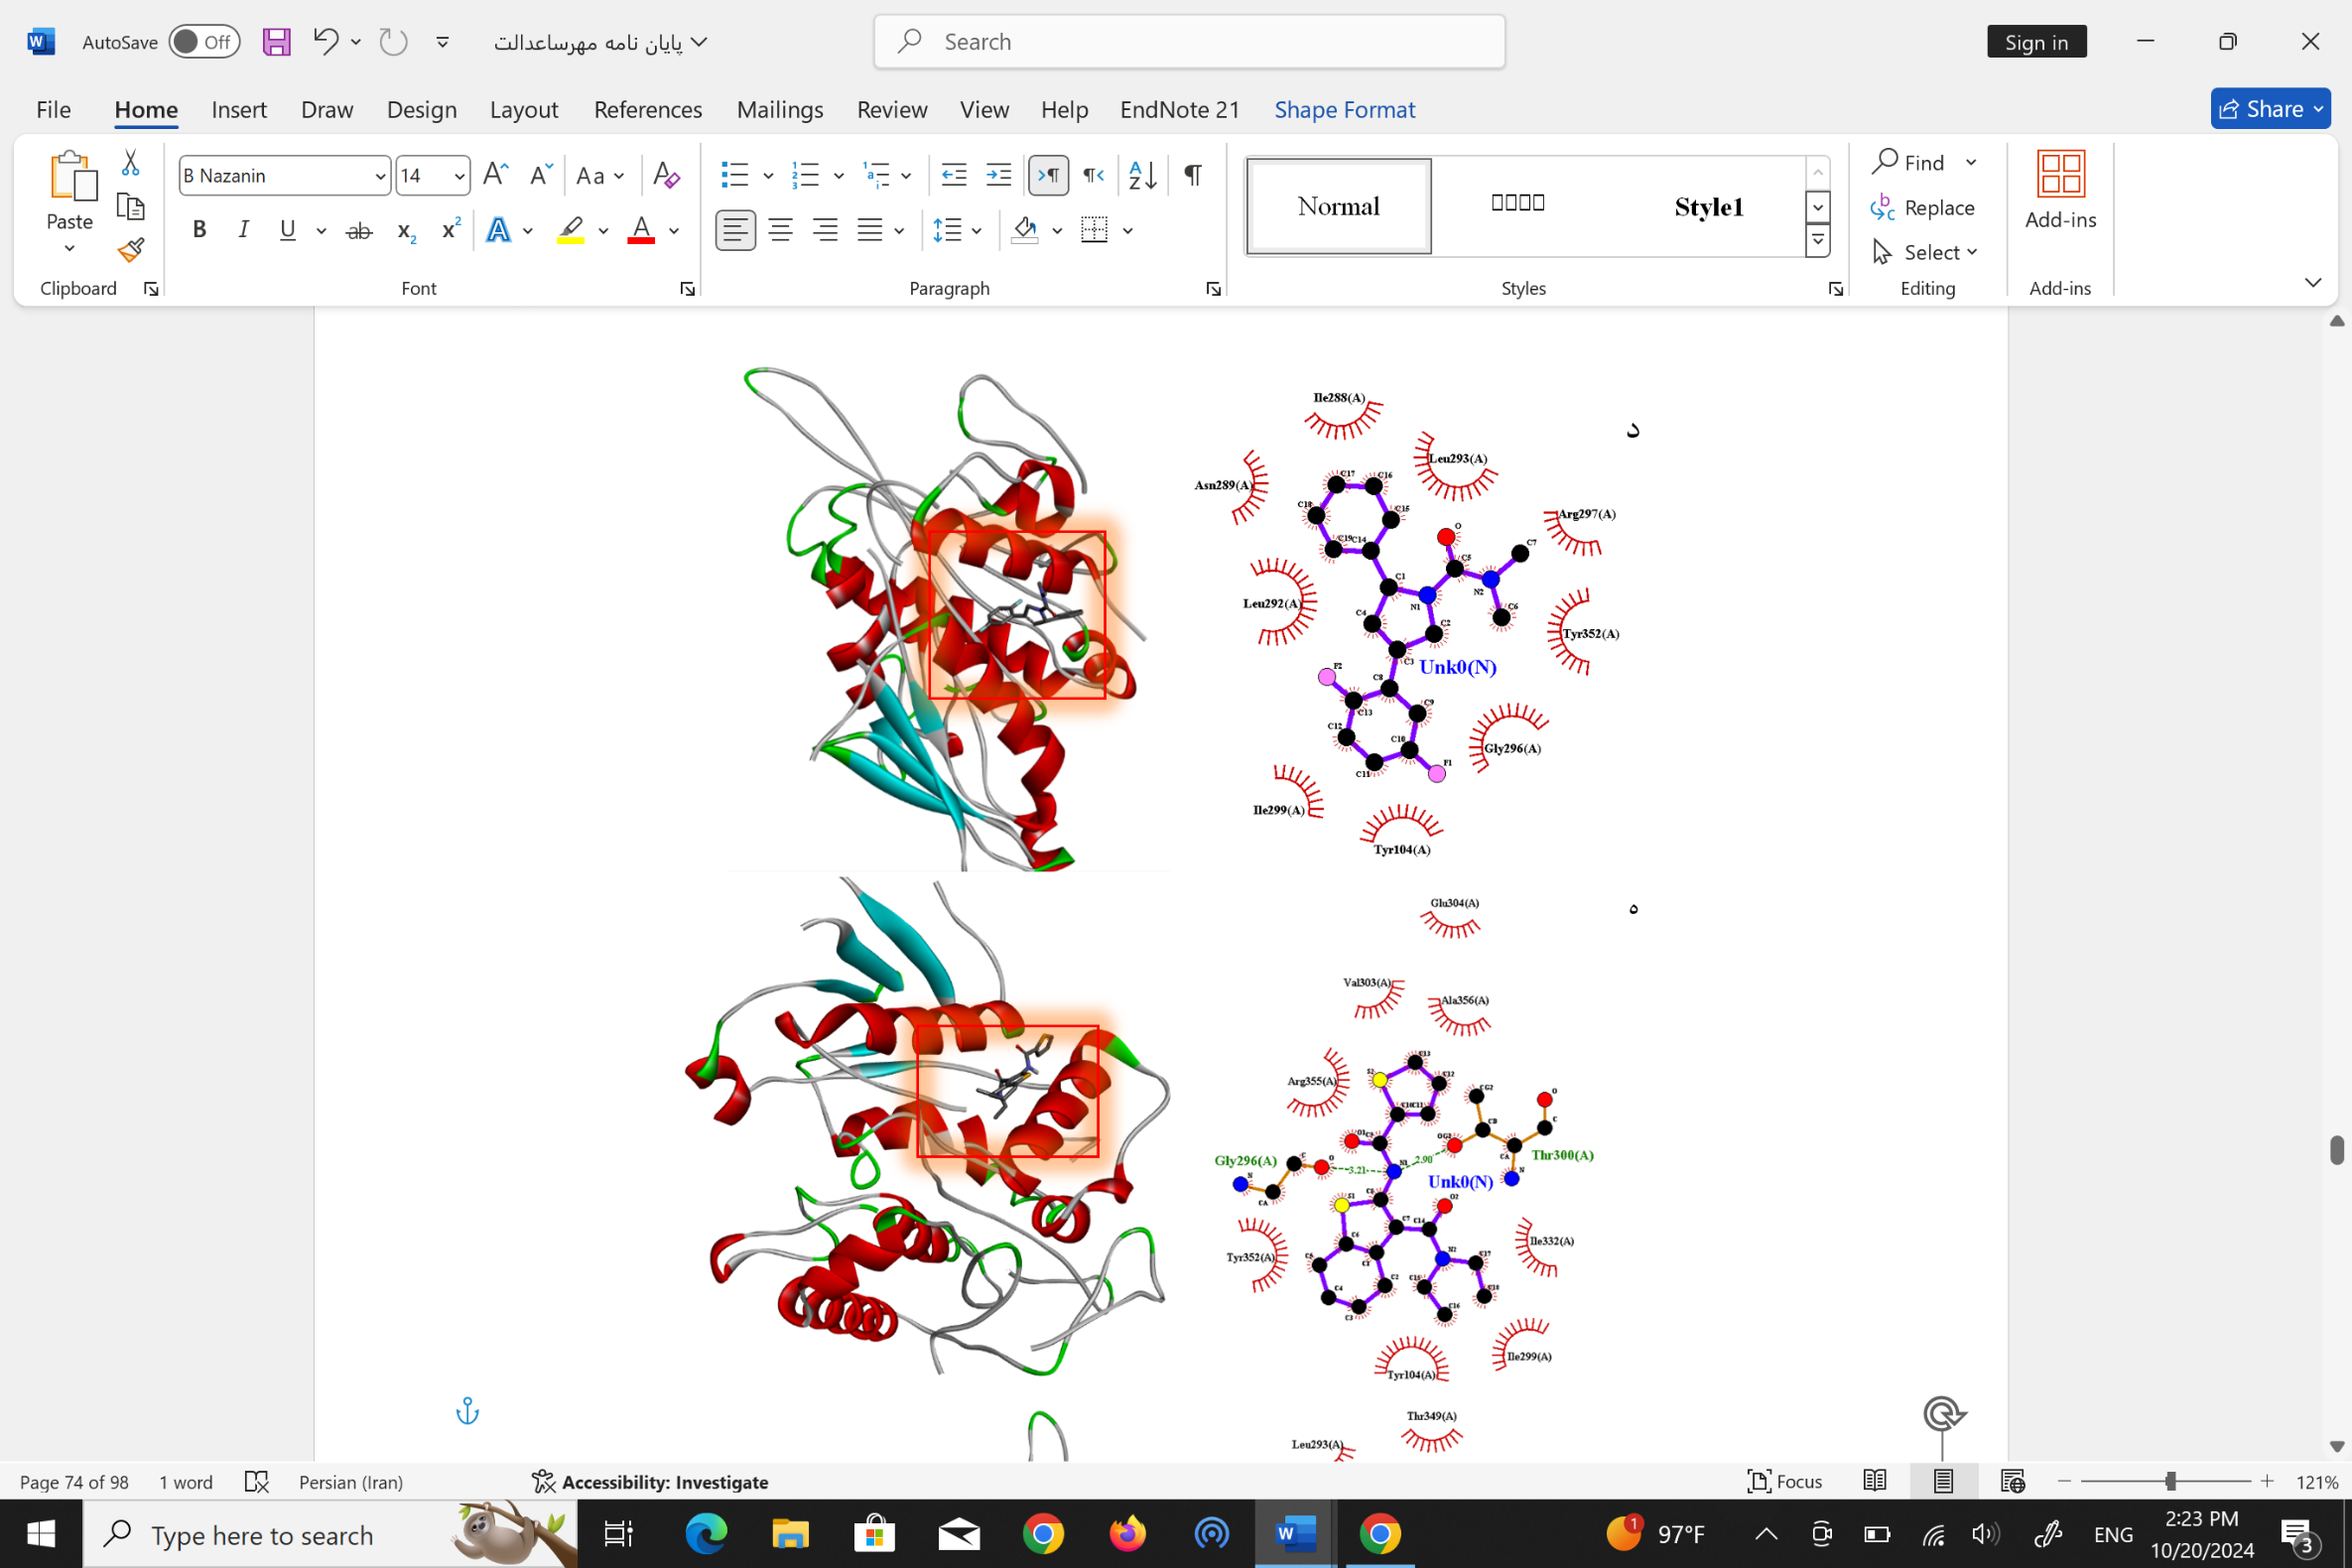


**(d)**

**(c)**

**(e)**


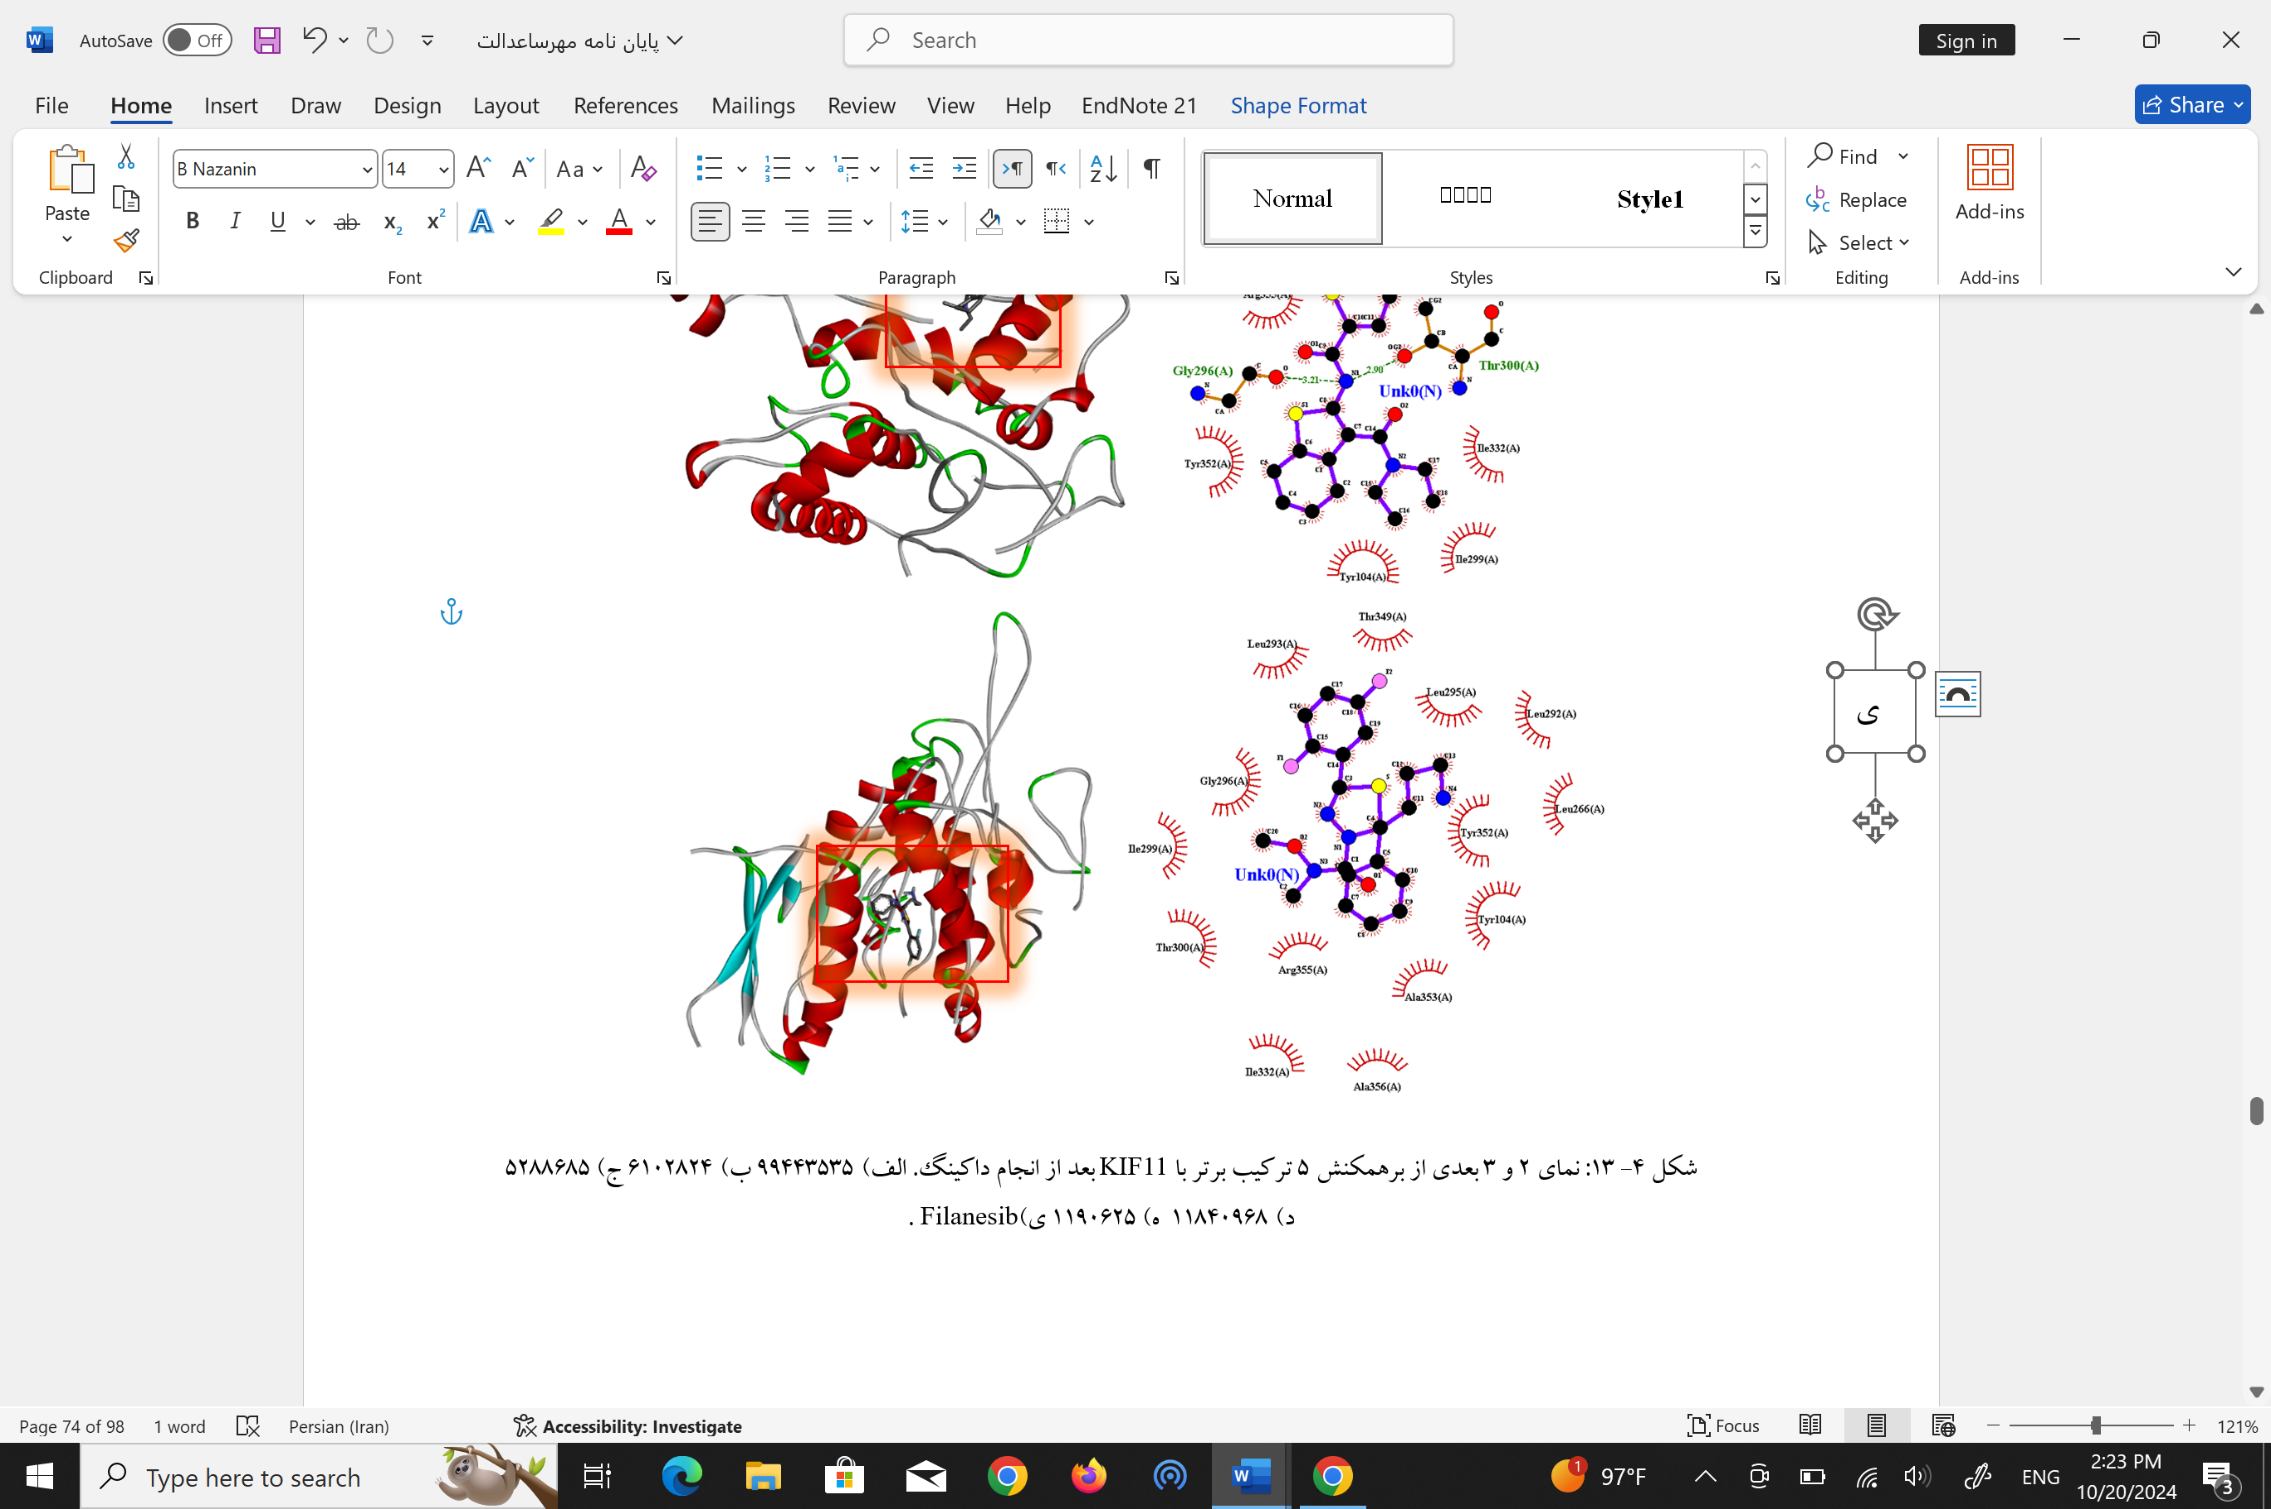


Figure S3. 2D and 3D views of the interactions of the remaining top compounds with KIF11 after docking. (a) Compound 6102824, (b) Compound 5288685, (c) Compound 11840968, (d) Compound 1190625, and (e) Filanesib. Each panel illustrates the binding interactions and conformations of the compounds with the KIF11 protein.

Table S5. Docking results for the top 5 compounds against CCNA2. This table includes the binding energies and key interaction details for each compound, highlighting their potential as inhibitors of the CCNA2 protein.

| Ligad Name | Binding Affinity (kj/mol) | H-bond and length(Å) | Hydrophobic interaction |
| --- | --- | --- | --- |
| 4566 | -8.60 | Thr316(2.98), Tyr197(3.03) | Ile182, Glu317, Tyr180, Ser181, Phe152, Val157, Glu174, Gly153, Asn173, Leu320, Phe319 |
| 4564 | -8.50 | Glu190(3.04), Tyr350(2.97) | Lys194, Pro195, Leu348, Tyr347, Leu341, Ile355, Val131, Val236, Ser340, Asn273, Pro352, Cys193 |
| 449087 | -8.40 | Asn173(2.84) | His179, Phe152, Gln317, Gly153, Thr316, Pro155, Tyr197, Leu320, Val157, Glu174, Ile182 |
| 23727982 | -8.3 | Ser340(2.97), Asn237 (3.23), Tyr350(2.96) | Pro195, Gln190, Pro352, Cys193, Lys194, Leu341, Arg211, Leu348, Asp240, Ile355, Pro309, Tyr347, Glu190, Val236, His233 |
| 23727981 | -8.10 | Ser340(3.01), Asn237 (3.17), Tyr350(2.90) | Pro195, Gln190, Pro352, Cys193, Lys194, Leu341, Arg211, Leu348, Asp240, Ile355, Pro309 |
| Omacetaxine_Mepesuccinate | -7.30 | Glu230(2.05), Asn312(3.05), Tyr197(3.13) | Ala135, Phe319, Thr316, Pro155, Val154, Asn229, Glu288, Met334, Glu330, Leu320 |


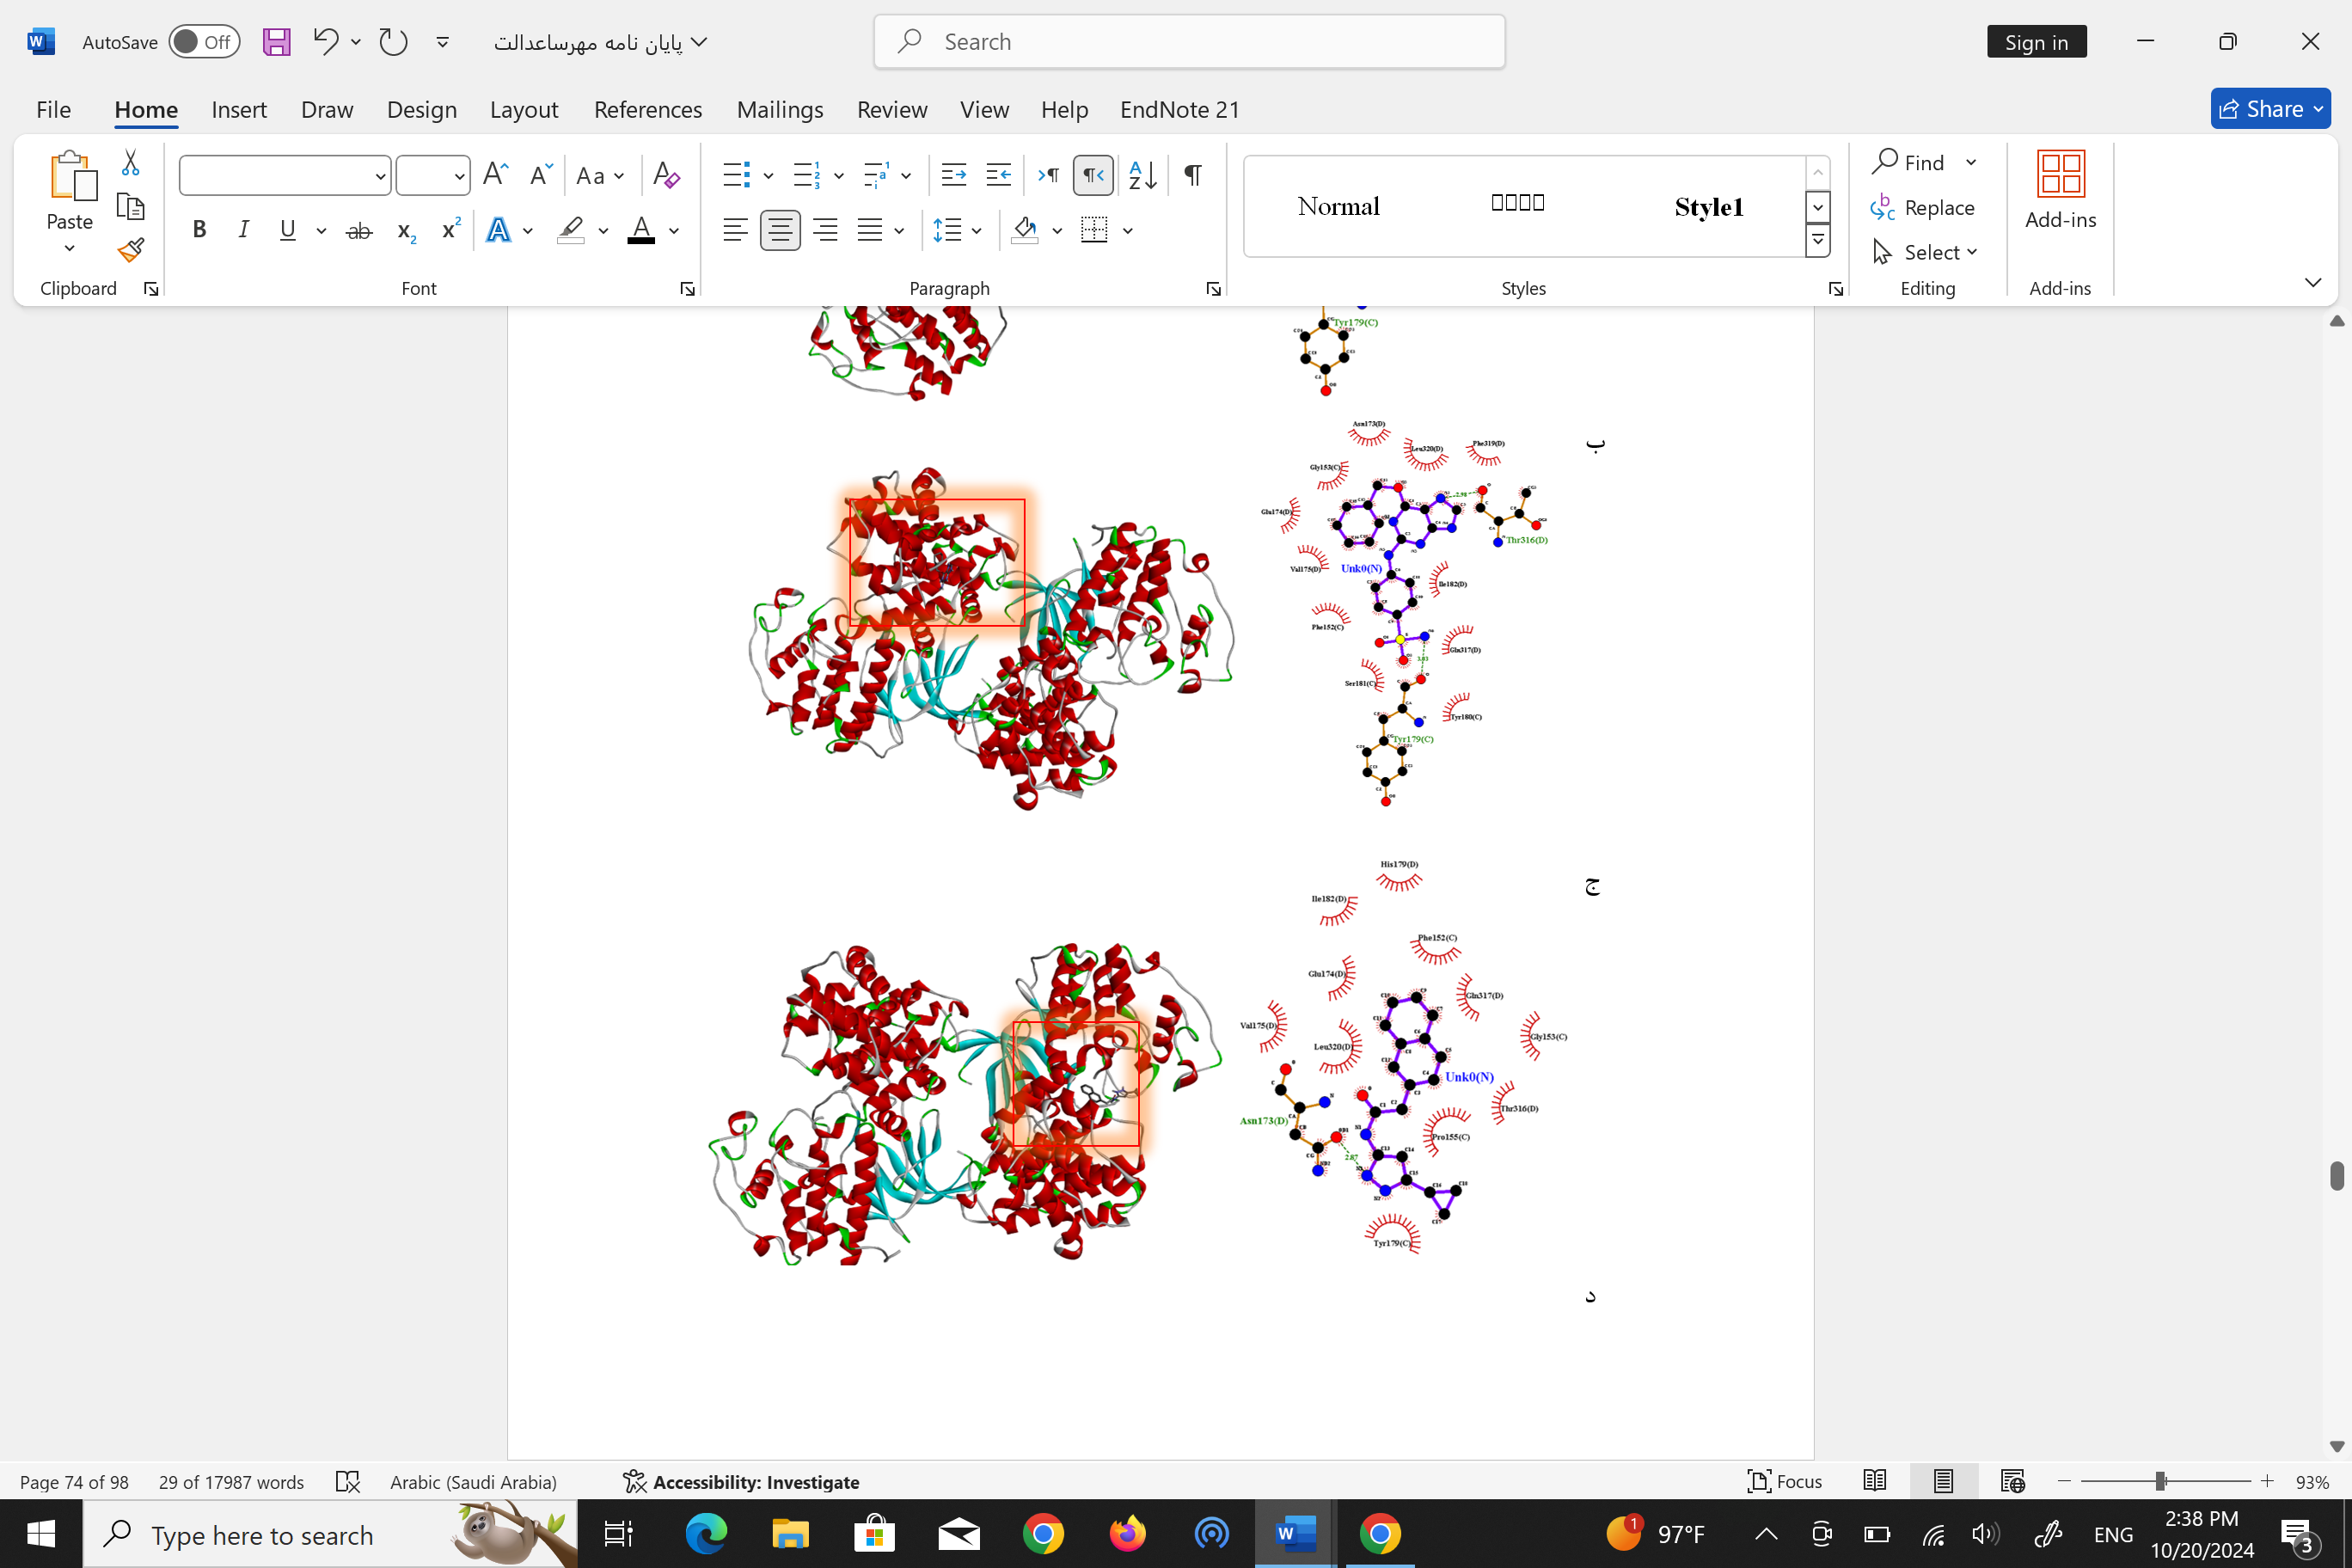


**(c)**

**(a)**

**(b)**


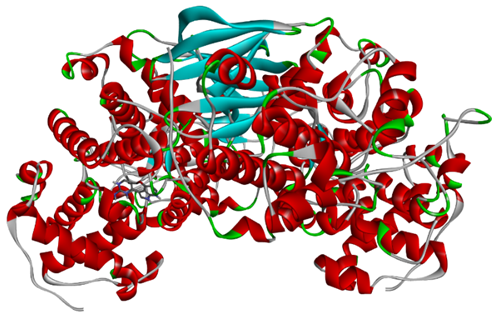

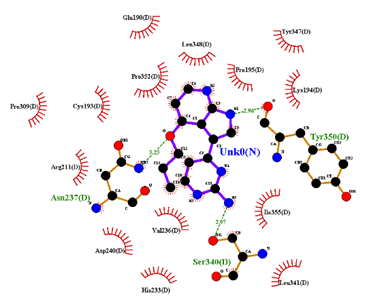


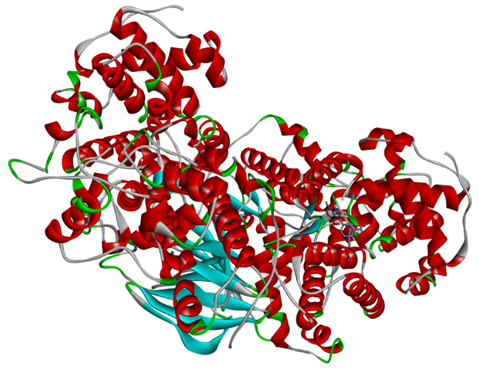

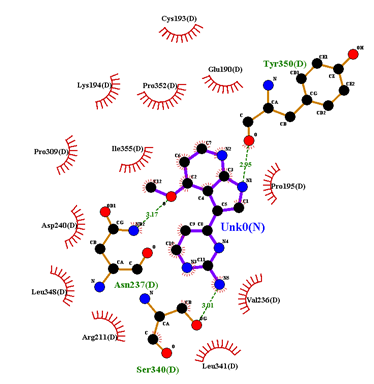


**(e)**

**(d)**


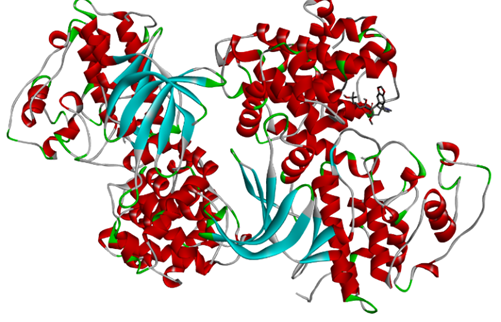

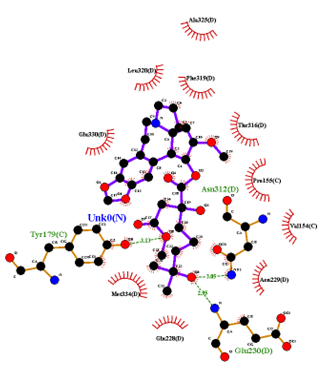


Figure S4. 2D and 3D views of the remaining top compounds docked with CCNA2. (a) Compound 4564. (b) Compound 449087. (c) Compound 23727982. (d) Compound 23727981. (e) Control compound Omacetaxine Mepesuccinate.

Table S6. Docking results of the top 5 compounds against CDK1, including binding energy and interaction details.

| Ligad Name | Binding Affinity (kj/mol) | H-bond and length(Å) | Hydrophobic interaction |
| --- | --- | --- | --- |
| 5005498 | -9.00 | - | Gln192, Gly13, Ala154, Asp146, Val64, Phe80, Ala31, Leu135, Val18, Lys33, Asn133 |
| Flavopiridol | -8.50 | Lys33(2.8), Asp146(2.70), Glu81(2.70), Leu83(2.80) | Phe82, Val64, Phe80, Leu135, Ala31, Ala145, Gly13, Asn133, Gln132, Ile10, Met85, Asp86 |
| 5287969 | -8.2 | Ile10(2.85), Lys33(2.96), Lys33(2.97) | Asp154, Leu135, Ala31, Leu83, Ser84, Lys89, Asp86, Glu132, Asp146, Gly13 |
| 3707 | -8.00 | Leu135(2.70), Leu135(3.10), Ile10(2.98) | Lys33, Asp146, Ala154, Val64, Phe80, Ala31, Leu135, Ser84, Asp86, Lys89, Met85 |
| 11338033 | -7.50 | Lys33(3.03) | His162, Gln132, Gly13, Asp146, Leu135, Val118, Ile10, Ala31, Glu12 |
| 135413546 | -7.00 | Asn133(3.05), Asp146(2.93) | Leu135, Lys33, Leu135, Gln132 |


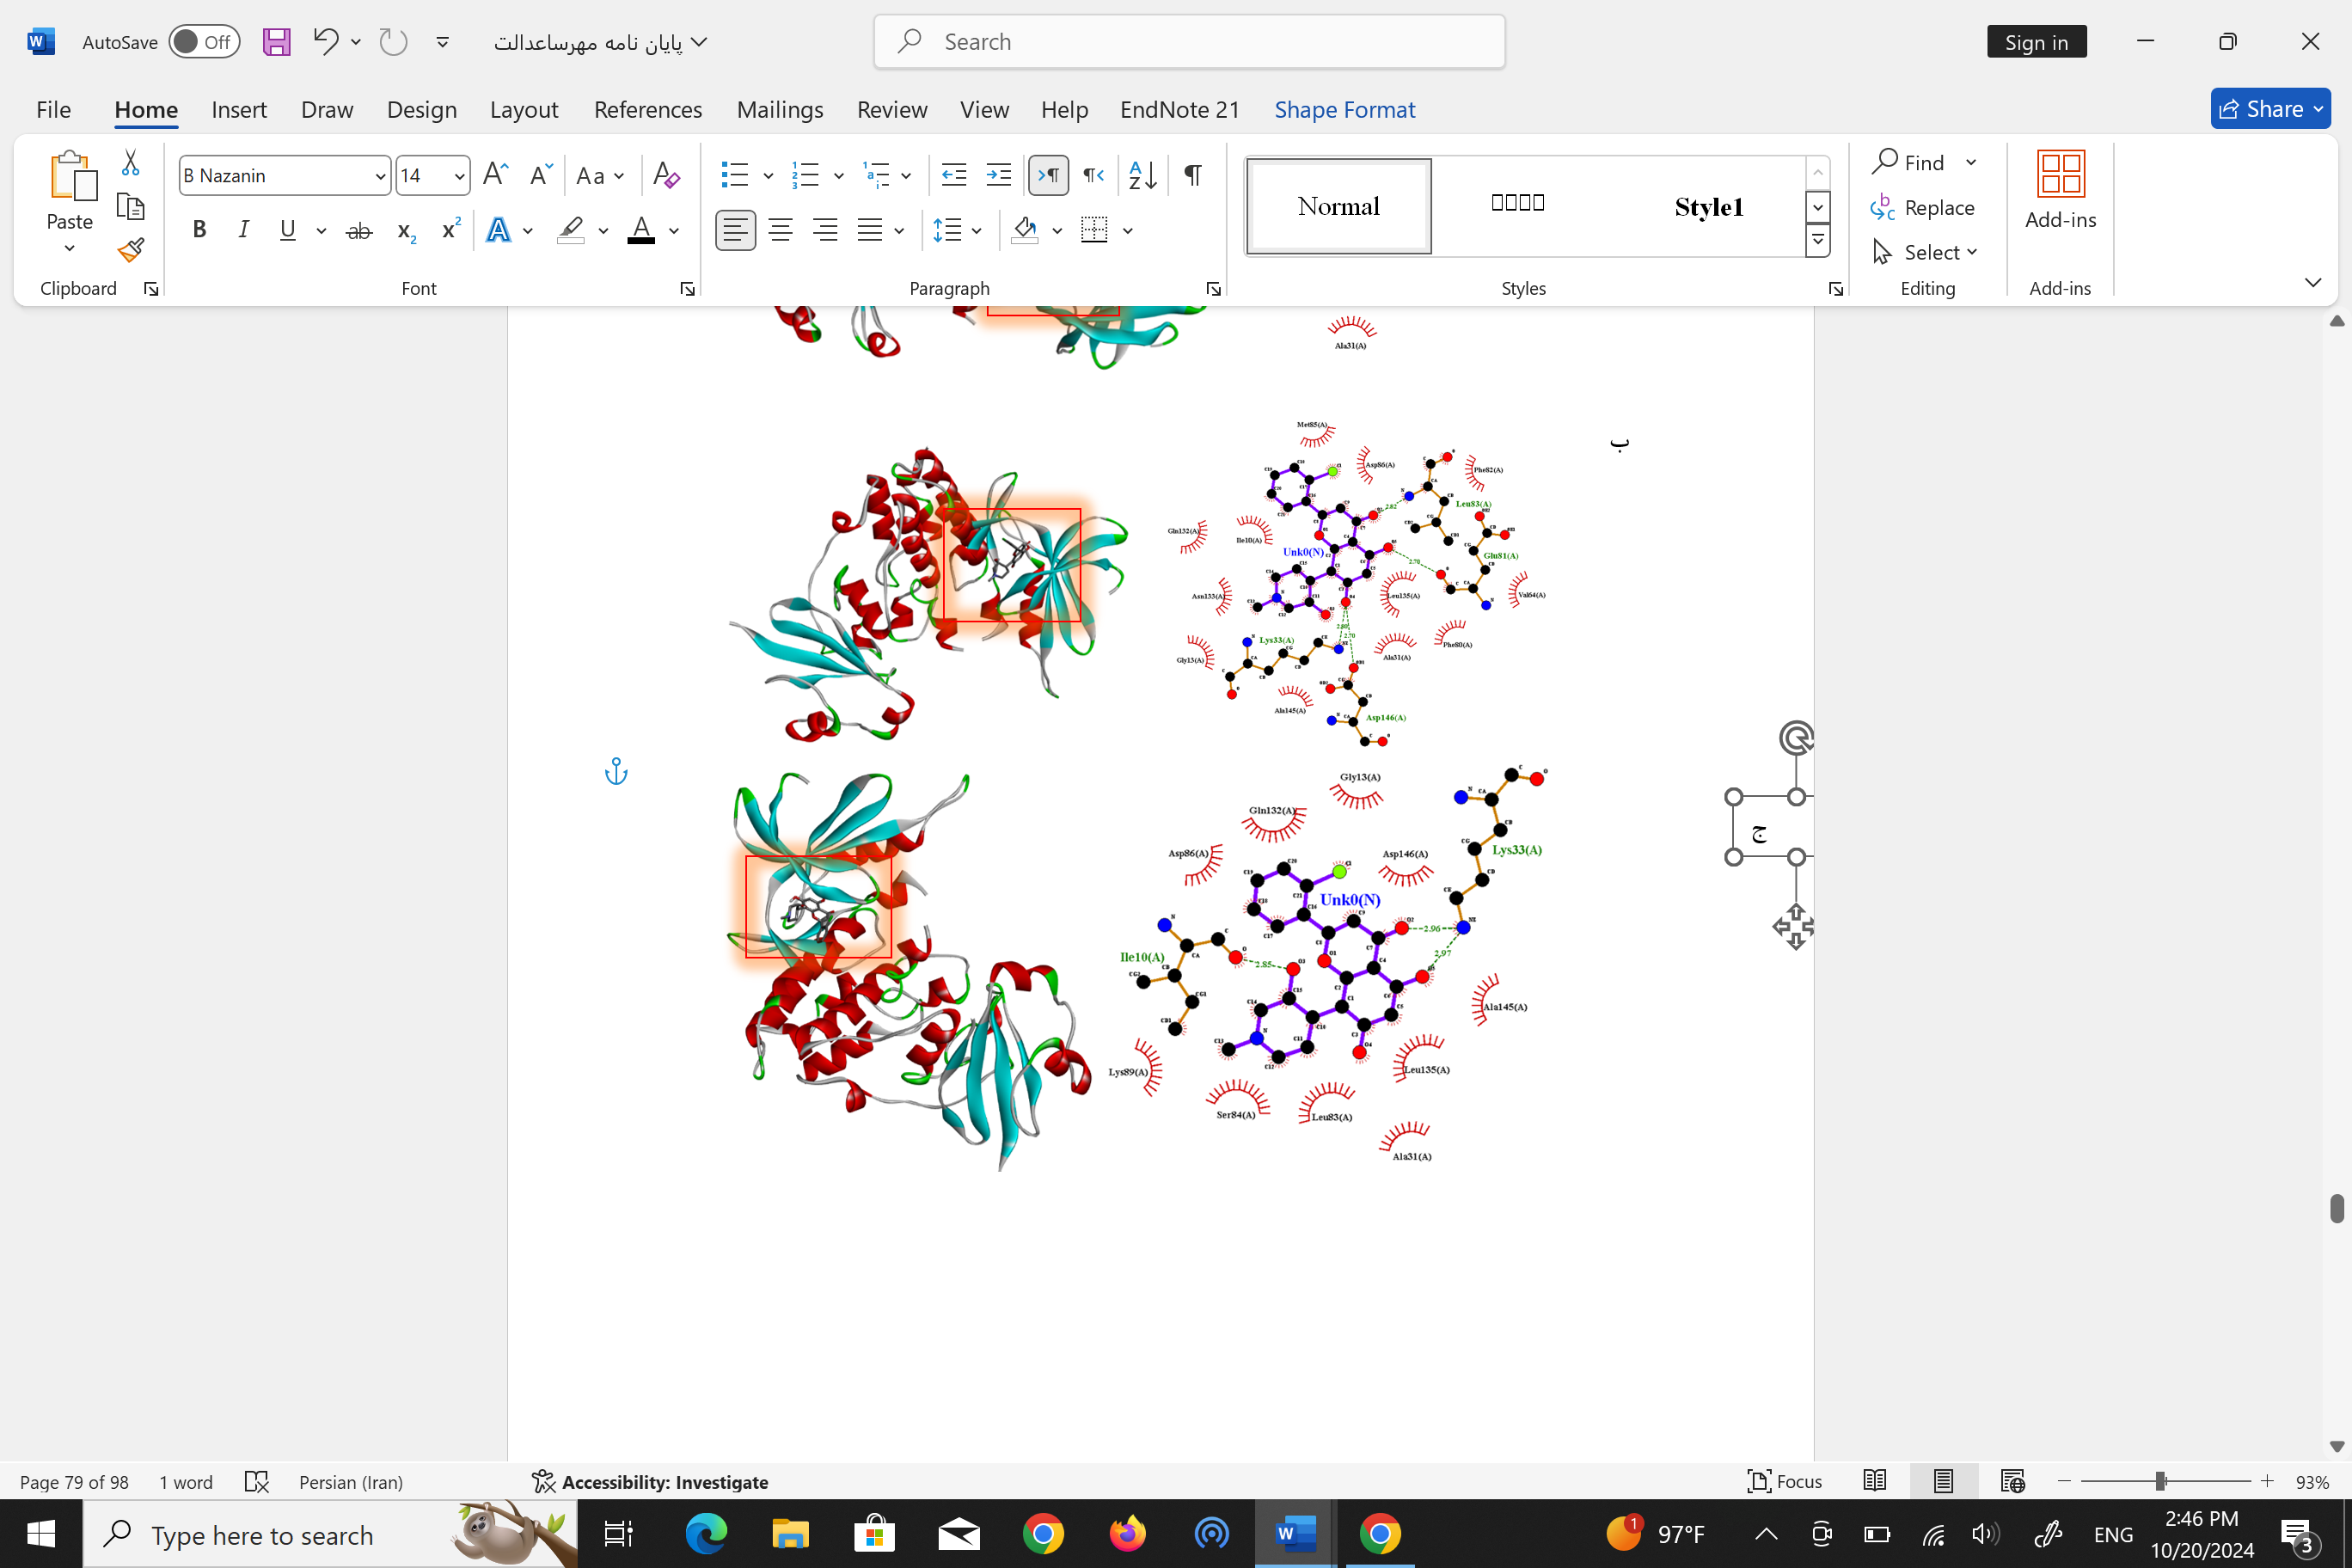


**(b)**

**(a)**


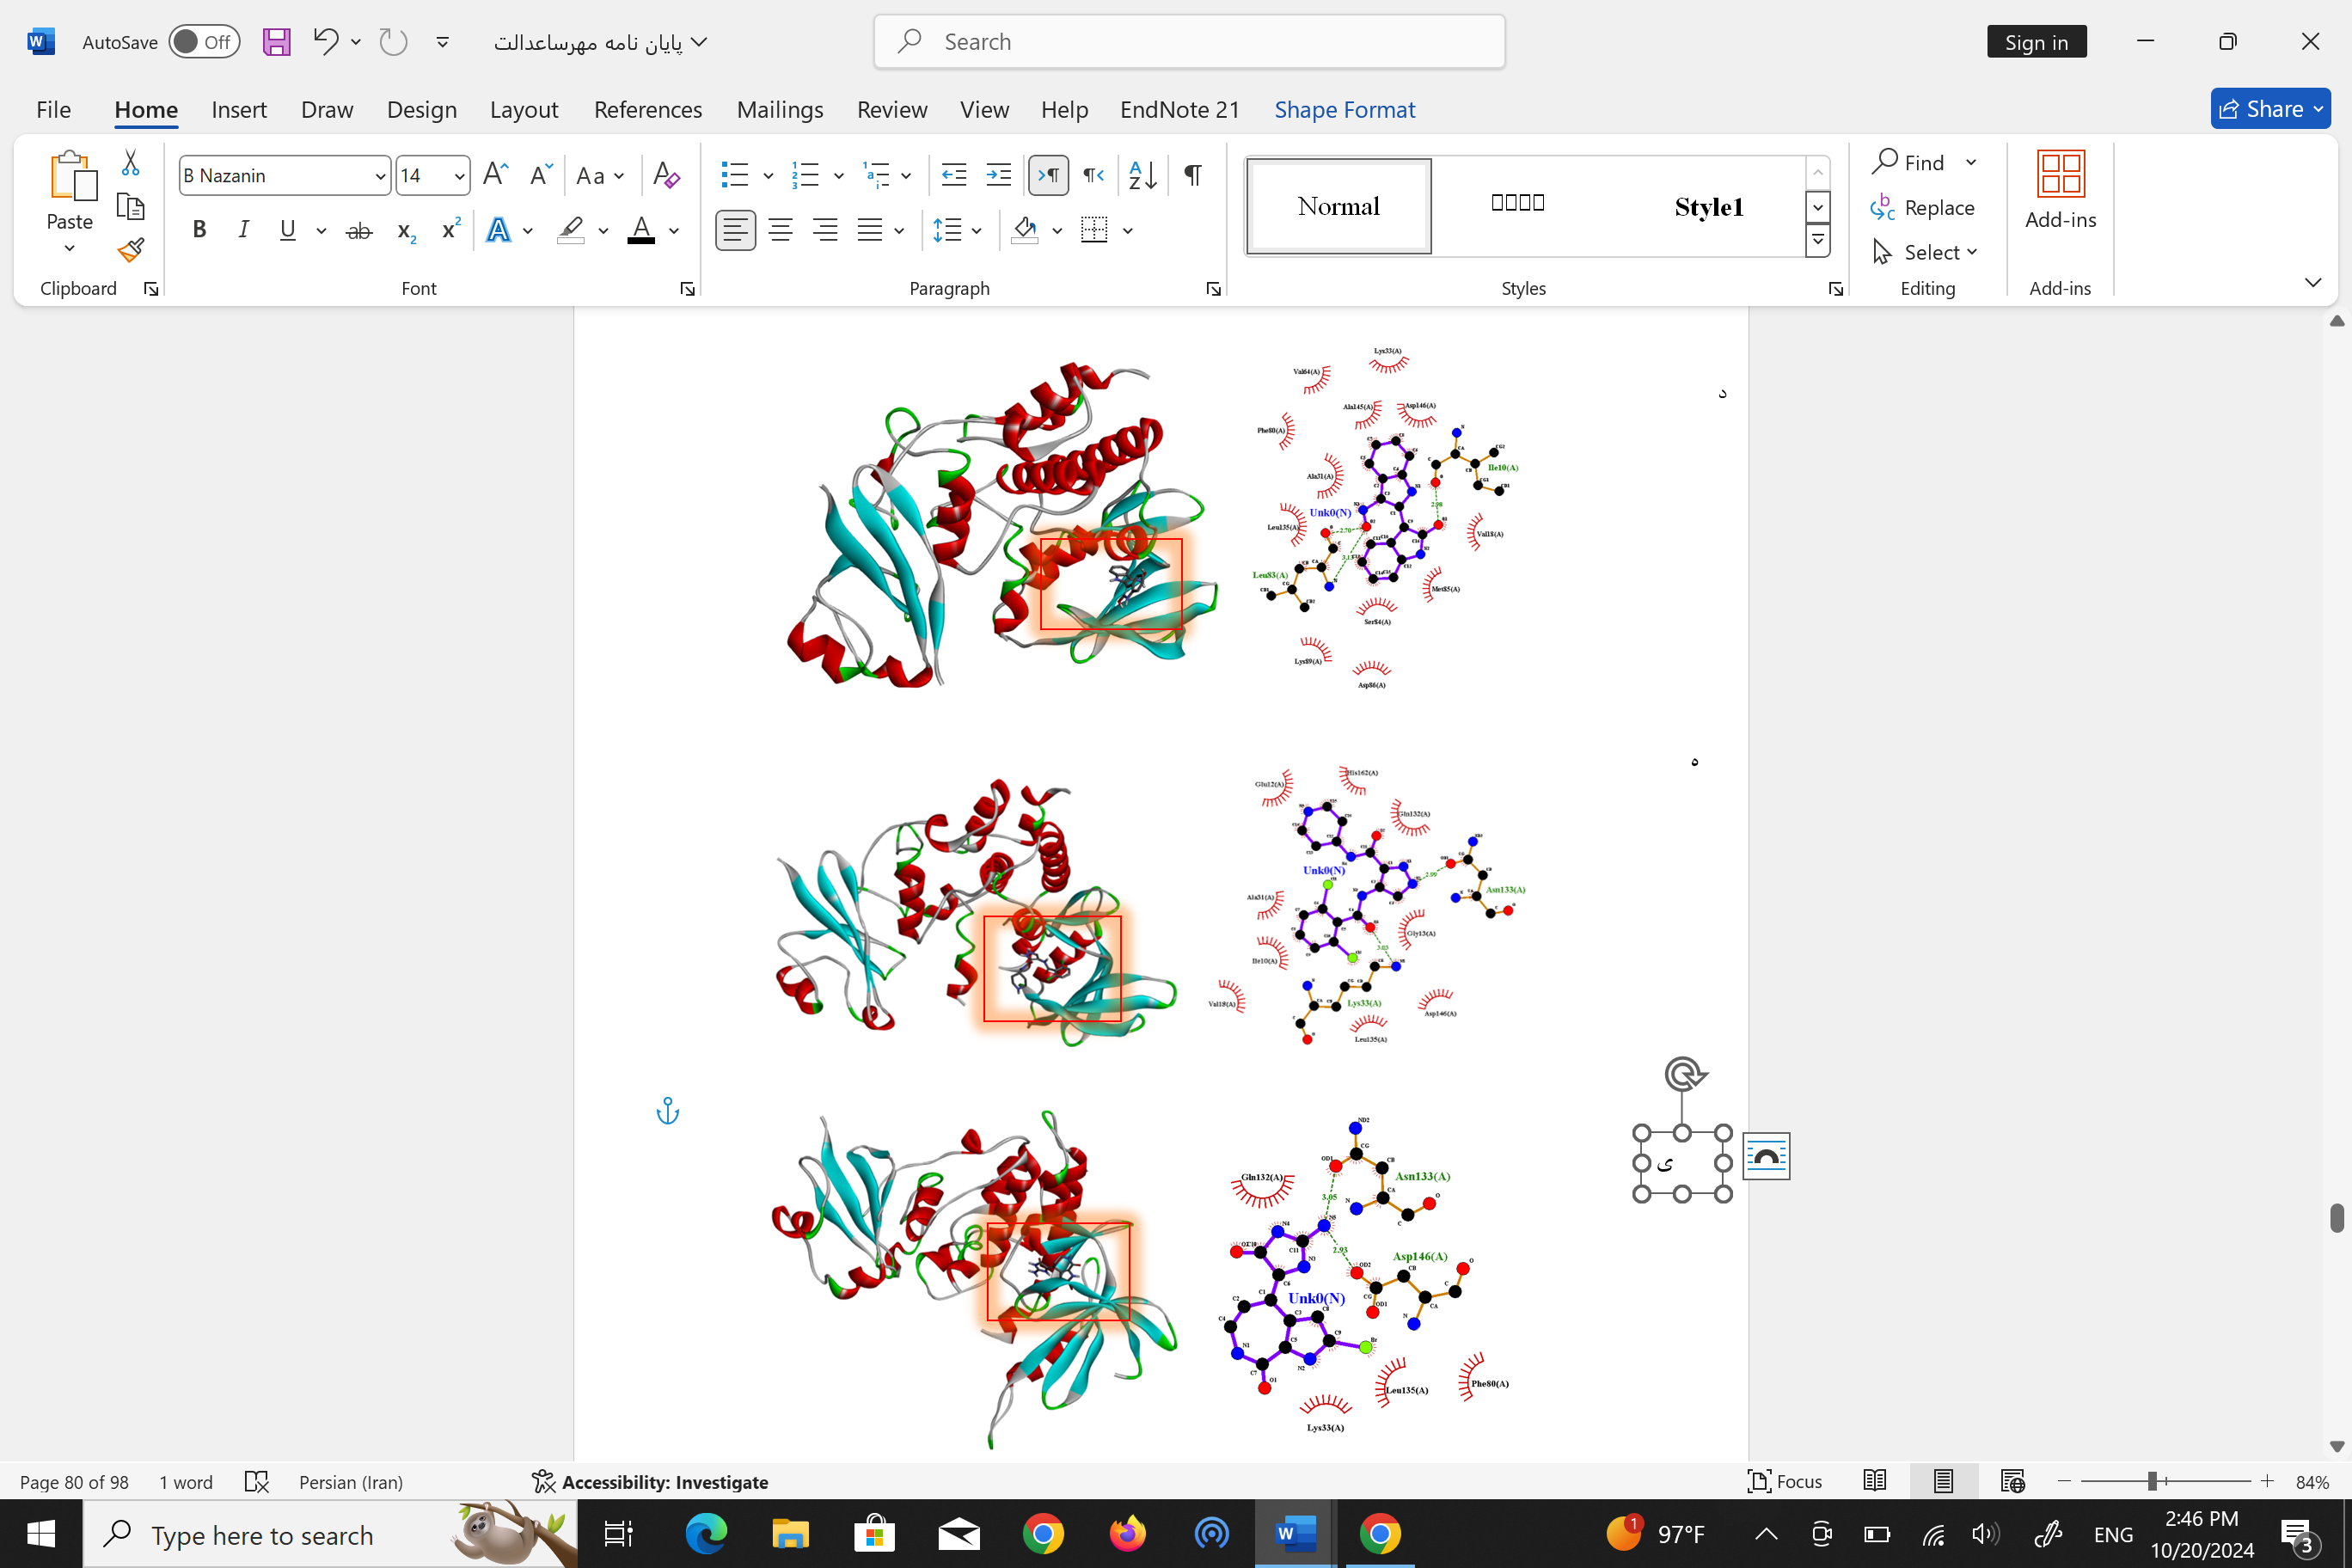


**(e)**

**(d)**

**(c)**

Figure S5. 2D and 3D views of the interactions of the top compounds with CDK1 after docking. (a) Flavopiridol. (b) Compound 5287969. (c) Compound 3707. (d) Compound 11338033. (e) Compound 135413546.

**List of Abbreviations**

| **Abbreviation** | **Definition** |
| --- | --- |
| KIF11 | kinesin family member 11 |
| CCNA2 | cyclin A2 |
| CDK1 | Cyclin-dependent kinase 1 |
| BUB1 | budding uninhibited by benzimidazoles 1 |
| CDCA8 | Cell Division Cycle Associated 8 |
| DLGAP5 | Disks large-associated protein 5 |
| TTK | threonine tyrosine kinase |
| KIF20A | Kinesin Family Member 20A |
| TPX2 | Targeting protein for Xklp2 |
| SPAG5 | Sperm-associated Antigen 5 |
| Ala356 | Alanine 356 |
| Thr300 | Tyrosine 300 |
| Ile299 | Isoleucine 299 |
| Gly296 | Glycine 269 |
| Ile332 | Isoleucine 332 |
| Ser269 | Serine 269 |
| Leu292 | Leucine 292 |
| Leu293 | Leucine 293 |
| Tyr104 | Tyrosine 104 |
| Arg355 | Arginine 355 |
| Ile182 | Isoleucine 182 |
| Glu317 | Glutamic acid 317 |
| Tyr180 | Tyrosine 180 |
| Ser181 | Serine 181 |
| Phe152 | Phenylalanine 152 |
| Val157 | Valine 157 |
| Glu174 | Glutamic acid 174 |
| Gly153 | Glycine 153 |
| Asn173 | Asparagine 173 |
| Leu320 | Leucine 320 |
| Phe319 | Phenylalanine 319 |
| Thr316 | Threonine 316 |
| Tyr197 | Tyrosine 197 |
| Gln192 | Glutamine 192 |
| Gly13 | Glycine 13 |
| Ala154 | Alanine 154 |
| Asp146 | Aspartic acid 146 |
| Val64 | Valine 164 |
| Phe80 | Phenylalanine 80 |
| Ala31 | Alanine 31 |
| Leu135 | Leucine 135 |
| Val18 | Valine 18 |
| Lys33 | Lysine 33 |
| Asn133 | Asparagine 133 |
